# Supplementary material
Source: publisher figshare collection journal article supplement (https://acs.figshare.com/ndownloader/files/5698485)
Supplement: Supplementary file 1 [file 5698485]

Title: Coupling of Coordinated 2-Iminophosphorano-1-phosphaallyl leading to Bridged-Iminophosphoranato Complexes of Zirconium and Hafnium

Authors: Zhong-Xia Wang, Ye-Xin Li

Manuscript Number: IC0259179

### Synthesis of complexes **3-5**

Synthesis of complex **3**: To a stirred solution of **1** ( $n = 1.5$ ) (3.44 g, 7.23 mmol) in 40 mL of Et<sub>2</sub>O was added ZrCl<sub>4</sub> (0.85 g, 3.64 mmol) at  $-80\text{ }^{\circ}\text{C}$ . The reaction mixture was warmed to room temperature and stirred for 15 h. The mixture was filtered and the filtrate was concentrated *in vacuo*. Pale yellow crystals were obtained after 3 days. Yield: 1.29 g (33.8 %). m.p.  $>300\text{ }^{\circ}\text{C}$ . Slow decomposition of this compound in the course of crystallization prevented us from obtaining satisfactory elemental analysis.

Synthesis of complex **4**: To a stirred solution of **1** ( $n = 1.5$ ) (1.19 g, 2.50 mmol) in 30 mL of Et<sub>2</sub>O at  $-80\text{ }^{\circ}\text{C}$  was added HfCl<sub>4</sub> (0.41 g, 1.28 mmol). The reaction mixture was allowed to reach room temperature and stirred for 15 h. Volatiles were removed *in vacuo*. The residue was extracted with CH<sub>2</sub>Cl<sub>2</sub> and filtered. Crystallization at room temperature afforded 0.32 g of **4**·CH<sub>2</sub>Cl<sub>2</sub> as pale yellow crystals. Further concentration of the mother liquor and keeping at  $-20\text{ }^{\circ}\text{C}$  gave again 0.35 g of product, yield: 51.1 %. m.p.  $246\text{ }^{\circ}\text{C}$  (dec.). Anal. Calcd for C<sub>39</sub>H<sub>54</sub>Cl<sub>4</sub>N<sub>2</sub>P<sub>4</sub>Si<sub>2</sub>Hf: C, 44.56; H, 5.18; N, 2.66. Found: C, 44.28; H, 5.41; N, 2.98.

Synthesis of complex **5**: To a solution of **2** ( $n = 2$ ) (1.59 g, 2.54 mmol) in 30 mL of Et<sub>2</sub>O at  $-80\text{ }^{\circ}\text{C}$  was added ZrCl<sub>4</sub> (0.26 g, 1.12 mmol) with stirring. The reaction mixture was warmed to room temperature and stirred for 15 h, resulting in a deep red solution. Volatiles were removed *in vacuo*, and the residue was extracted with CH<sub>2</sub>Cl<sub>2</sub> and filtered. The filtrate was concentrated to about 3 mL and then about 3 mL of Et<sub>2</sub>O was added. Concentration of the mixture gave 0.22 g of deep red crystals of complex **5**·Et<sub>2</sub>O·0.6CH<sub>2</sub>Cl<sub>2</sub>. The mother liquor was kept at  $-20\text{ }^{\circ}\text{C}$  to give further 0.21 g of product, yield: 31.1 %. m.p.:  $222\text{--}224\text{ }^{\circ}\text{C}$ . Anal. Calcd for C<sub>50</sub>H<sub>80</sub>Cl<sub>2</sub>N<sub>2</sub>P<sub>4</sub>Si<sub>4</sub>Zr·0.6CH<sub>2</sub>Cl<sub>2</sub>: C, 52.46; H, 7.07; N, 2.42. Found: C, 52.38; H, 6.97; N, 2.40.
